# Supplementary material
Source: PubMed Central journal article supplement (PMC4869716)
Supplement: NIHMS784655-supplement.pdf [file NIHMS784655-supplement.pdf]

# Supplementary Figure 1

**Ab: Phospho-eNOS (S1177) [800]**

MW    Con    PE    PE+  
Go6976    PE+    PE+    PE+    PE+  
BAPTA    Thaps    XPC

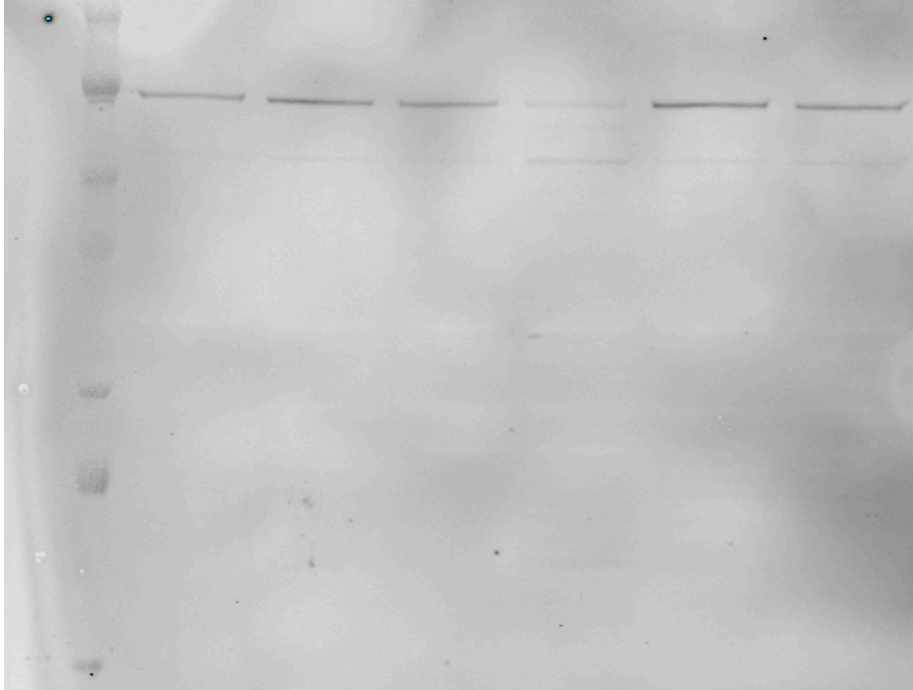

**Ab: total-eNOS (upper band [700])**

**Ab: GAPDH (lower band [800])**

MW    Con    PE    PE+  
Go6976    PE+    PE+    PE+    PE+  
BAPTA    Thaps    XPC

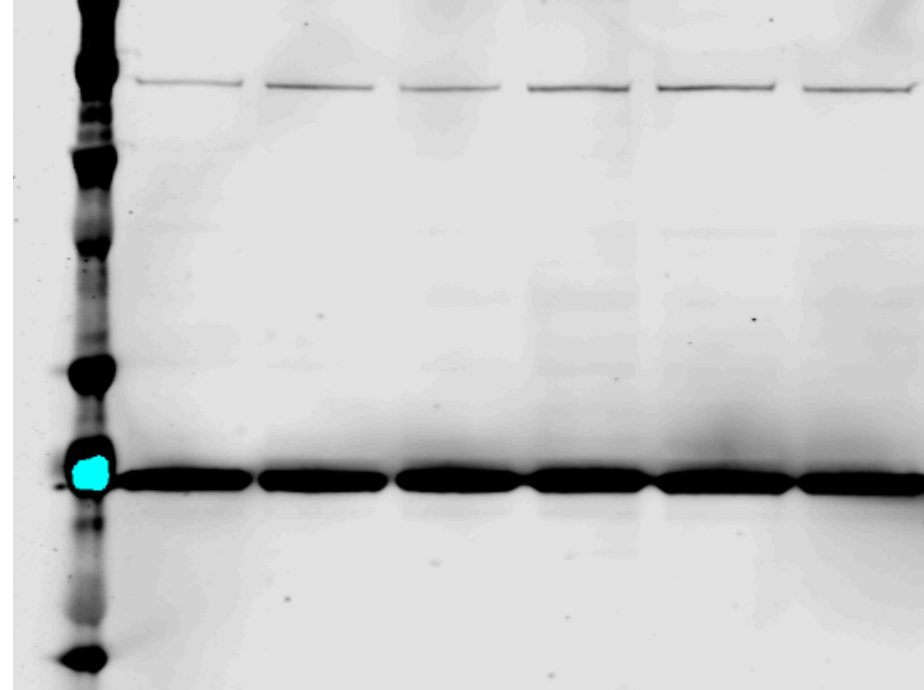

*Same blot, stripped and re-probed  
All blots developed with Li-Cor imager*
